# Supplementary material
Source: ML conference proceedings conference paper supplement (https://proceedings.neurips.cc/paper_files/paper/2020/hash/f0bda020d2470f2e74990a07a607ebd9-Abstract.html)
Supplement: Supplementary file [file f0bda020d2470f2e74990a07a607ebd9-Supplemental.zip]

## 361 A More Discussions about the Distributions

362 Fig. 9 depicts the ideas of Dirac delta, Gaussian, and the proposed General distributions, where the assumption  
 363 goes from rigid (Dirac delta) to flexible (General). We also list several key comparisons about these distributions  
 364 in Table 5. It can be observed that the loss objective of the Gaussian assumption is actually a dynamically  
 365 weighted L2 Loss, where its training weight is related to the predicted variance  $\sigma$ . It is somehow similar to that  
 366 of Dirac delta (standard L2 Loss) when optimized at the edge level. Moreover, it is not clear how to integrate  
 367 the Gaussian assumption into the IoU-based Loss formulations, since it heavily couples the expression of the  
 368 target representation with its optimization objective. Therefore, it can not enjoy the benefits of the IoU-based  
 369 optimization [24], as it is proved to be very effective in practice. In contrast, our proposed General distribution  
 370 decouples the representation and loss objective, making it feasible for any type of optimizations, including both  
 371 edge level and box level.

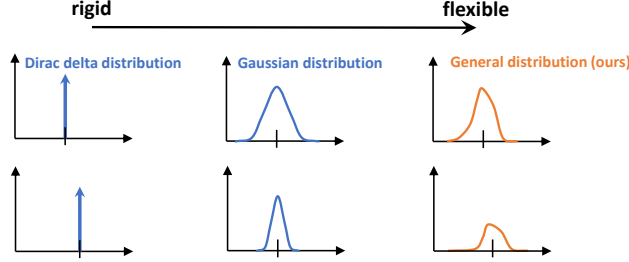

Figure 9: Illustrations of three distributions, from rigid (Dirac delta) to flexible (General). The proposed General distribution is more flexible as its shape can be arbitrary. In contrast, Dirac delta distribution roots at a fixed point and Gaussian distribution follows a relatively rigid, symmetric expression, e.g.,  $\frac{1}{\sigma\sqrt{2\pi}}e^{-\frac{(x-\mu)^2}{2\sigma^2}}$ , which both have more limitations in modeling real data distribution.

| Type                          | Dirac delta [26, 31] |                | Gaussian [4, 10]                                        |  | General (ours)                    |                |
|-------------------------------|----------------------|----------------|---------------------------------------------------------|--|-----------------------------------|----------------|
| Probability Density           | $\delta(x - y)$      |                | $N(x, \sigma^2)$                                        |  | $P(x)$                            |                |
| Inference Target              | $x$                  |                | $x$                                                     |  | $\int P(x)x dx$                   |                |
| Loss Objective (for box part) | $\frac{(x-y)^2}{2}$  | IoU-based Loss | $\frac{(x-y)^2}{2\sigma^2} + \frac{1}{2}\log(\sigma^2)$ |  | $\frac{(\int P(x)x dx - y)^2}{2}$ | IoU-based Loss |
| Optimization Level            | edge                 |                | edge                                                    |  | edge                              | box            |

Table 5: Comparisons between three distributions. “edge” level denotes optimization over four respective directions, whilst “box” level means IoU-based Losses [24] that consider the bounding box as a whole.

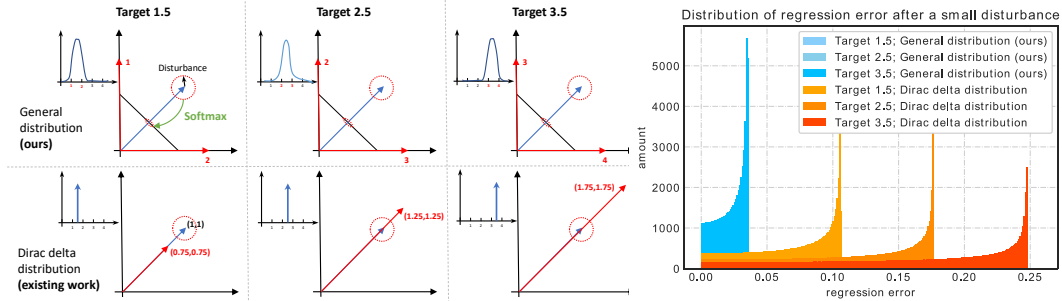

Figure 10: We demonstrate an example in 2D space by fixing the input feature vector and introduce a small disturbance (norm of 0.1) over it. The regression targets are 1.5, 2.5, 3.5 respectively. It is observed that Dirac delta distribution leads to more regression errors after the same disturbance, and the error increases with the growth of regression target. In contrast, our proposed General distribution remains stable and insensitive to the disturbance.

372 We also find that the bounding box regression of Dirac delta distribution (including Gaussian distribution  
 373 based on the analysis from Table 5) behaves more sensitive to feature perturbations, making it less robust and  
 374 susceptible to noise, as shown in the simulation experiment (Fig. 10). It proves that General distribution enjoys  
 375 more benefits than the other counterparts.

## 376 B Global Minimum of $GFL(p_{y_l}, p_{y_r})$

377 Let’s review the definition of **GFL**:

$$GFL(p_{y_l}, p_{y_r}) = -|y - (y_l p_{y_l} + y_r p_{y_r})|^\beta ((y_r - y) \log(p_{y_l}) + (y - y_l) \log(p_{y_r})), \text{ given } p_{y_l} + p_{y_r} = 1.$$

378 For simplicity,  $\mathbf{GFL}(p_{y_l}, p_{y_r})$  can then be expanded as:

$$\begin{aligned}
\mathbf{GFL}(p_{y_l}, p_{y_r}) &= -|y - (y_l p_{y_l} + y_r p_{y_r})|^\beta ((y_r - y) \log(p_{y_l}) + (y - y_l) \log(p_{y_r})) \\
&= \underbrace{\left\{ |y - (y_l p_{y_l} + y_r p_{y_r})|^\beta \right\}}_{\mathbf{L}(\cdot, \cdot)} \underbrace{\left\{ -((y_r - y) \log(p_{y_l}) + (y - y_l) \log(p_{y_r})) \right\}}_{\mathbf{R}(\cdot, \cdot)} \\
&= \mathbf{L}(p_{y_l}, p_{y_r}) \mathbf{R}(p_{y_l}, p_{y_r}), \\
\mathbf{R}(p_{y_l}, p_{y_r}) &= -((y_r - y) \log(p_{y_l}) + (y - y_l) \log(p_{y_r})) \\
&= -((y_r - y) \log(p_{y_l}) + (y - y_l) \log(1 - p_{y_l})) \\
&\geq -((y_r - y) \log\left(\frac{y_r - y}{y_r - y_l}\right) + (y - y_l) \log\left(\frac{y - y_l}{y_r - y_l}\right)) \\
&= \mathbf{R}(p_{y_l}^*, p_{y_r}^*) > 0, \quad \text{where } p_{y_l}^* = \frac{y_r - y}{y_r - y_l}, p_{y_r}^* = \frac{y - y_l}{y_r - y_l}. \\
\mathbf{L}(p_{y_l}, p_{y_r}) &= |y - (y_l p_{y_l} + y_r p_{y_r})|^\beta \\
&\geq \mathbf{L}(p_{y_l}^*, p_{y_r}^*) = 0, \quad \text{where } p_{y_l}^* = \frac{y_r - y}{y_r - y_l}, p_{y_r}^* = \frac{y - y_l}{y_r - y_l}.
\end{aligned}$$

379 Furthermore, given  $\epsilon \neq 0$ , for arbitrary variable  $(p_{y_l}, p_{y_r}) = (p_{y_l}^* + \epsilon, p_{y_r}^* - \epsilon)$  in the domain of definition, we  
380 can have:

$$\begin{aligned}
\mathbf{R}(p_{y_l}, p_{y_r}) &= \mathbf{R}(p_{y_l}^* + \epsilon, p_{y_r}^* - \epsilon) > \mathbf{R}(p_{y_l}^*, p_{y_r}^*) > 0, \\
\mathbf{L}(p_{y_l}, p_{y_r}) &= \mathbf{L}(p_{y_l}^* + \epsilon, p_{y_r}^* - \epsilon) = |\epsilon(y_r - y_l)|^\beta > 0 = \mathbf{L}(p_{y_l}^*, p_{y_r}^*).
\end{aligned}$$

381 Therefore, it is easy to deduce:

$$\mathbf{GFL}(p_{y_l}, p_{y_r}) = \mathbf{L}(p_{y_l}, p_{y_r}) \mathbf{R}(p_{y_l}, p_{y_r}) \geq \mathbf{L}(p_{y_l}^*, p_{y_r}^*) \mathbf{R}(p_{y_l}^*, p_{y_r}^*) = 0,$$

382 where “=” holds only when  $p_{y_l} = p_{y_l}^*, p_{y_r} = p_{y_r}^*$ .

383 The global minimum property of GFL somehow explains why the IoU or centerness guided variants in Fig. 6  
384 would not have obvious advantages. In fact, the weighted guidance does not essentially change the global  
385 minimum of the original classification loss (e.g., Focal Loss), whilst their optimal classification targets are still  
386 one-hot labels. In contrast, the proposed GFL indeed modifies the global minimum and force the predictions to  
387 approach the accurate IoU between the estimated boxes and ground-truth boxes, which is obviously beneficial  
388 for the rank process of NMS.

## 389 C FL, QFL and DFL are special cases of GFL

390 In this section, we show how GFL can be specialized into the form of FL, QFL and DFL, respectively.

391 **FL:** Letting  $\beta = \gamma, y_l = 0, y_r = 1, p_{y_r} = p, p_{y_l} = 1 - p$  and  $y \in \{1, 0\}$  in GFL, we can obtain FL:

$$\begin{aligned}
\mathbf{FL}(p) &= \mathbf{GFL}(1 - p, p) = -|y - p|^\gamma ((1 - y) \log(1 - p) + y \log(p)), y \in \{1, 0\} \\
&= -(1 - p_t)^\gamma \log(p_t), p_t = \begin{cases} p, & \text{when } y = 1 \\ 1 - p, & \text{when } y = 0 \end{cases} \quad (9)
\end{aligned}$$

392 **QFL:** Having  $y_l = 0, y_r = 1, p_{y_r} = \sigma$  and  $p_{y_l} = 1 - \sigma$  in GFL, the form of QFL can be written as:

$$\mathbf{QFL}(\sigma) = \mathbf{GFL}(1 - \sigma, \sigma) = -|y - \sigma|^\beta ((1 - y) \log(1 - \sigma) + y \log(\sigma)). \quad (10)$$

393 **DFL:** By substituting  $\beta = 0, y_l = y_i, y_r = y_{i+1}, p_{y_l} = P(y_l) = P(y_i) = \mathcal{S}_i, p_{y_r} = P(y_r) = P(y_{i+1}) =$   
394  $\mathcal{S}_{i+1}$  in GFL, we can have DFL:

$$\mathbf{DFL}(\mathcal{S}_i, \mathcal{S}_{i+1}) = \mathbf{GFL}(\mathcal{S}_i, \mathcal{S}_{i+1}) = -((y_{i+1} - y) \log(\mathcal{S}_i) + (y - y_i) \log(\mathcal{S}_{i+1})). \quad (11)$$

## 395 D Details of Experimental Settings

396 **Training Details:** The ImageNet pretrained models [9] with FPN [17] are utilized as the backbones. During  
397 training, the input images are resized to keep their shorter side being 800 and their longer side less or equal to  
398 1333. In ablation study, the networks are trained using the Stochastic Gradient Descent (SGD) algorithm for  
399 90K iterations (denoted as 1x schedule) with 0.9 momentum, 0.0001 weight decay and 16 batch size. The initial  
400 learning rate is set as 0.01 and decayed by 0.1 at iteration 60K and 80K, respectively.

401 **Inference Details:** During inference, the input image is resized in the same way as in the training phase, and  
402 then passed through the whole network to output the predicted bounding boxes with a predicted class. Then we

use the threshold 0.05 to filter out a variety of backgrounds, and output top 1000 candidate detections per feature pyramid. Finally, NMS is applied under the IoU threshold 0.6 per class to produce the final top 100 detections per image as results.

## E Why is IoU-branch always superior than centerness-branch?

The ablation study in original paper also demonstrates that for FCOS/ATSS, IoU performs consistently better than centerness, as a measurement of localization quality. Here we give a convincing reason why this is the case. We discover the major problem of centerness is that its definition leads to unexpected small ground-truth label, which makes a possible set of ground-truth bounding boxes extremely hard to be recalled (as shown in Fig. 11). From the label distributions demonstrated in Fig. 12, we observe that most of IoU labels is larger than 0.4 yet centerness labels tend to be much smaller (even approaching 0). The small values of centerness labels prevent a set of ground-truth bounding boxes from being recalled, as their final scores for NMS would be potentially small since their predicted centerness scores are already supervised by these extremely small signals.

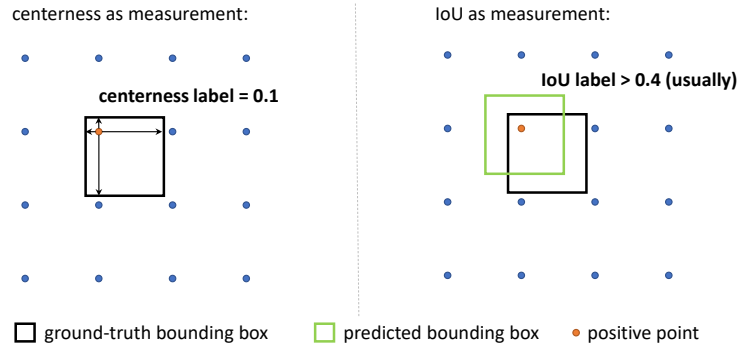

Figure 11: We demonstrate possible cases of ground-truth/predicted bounding box along with the positive points. The matrix points denote the feature pyramid layer with stride = 8. Centerness label is easier to get very small values by its definition, whilst IoU label is more reliable as the supervisions from bounding boxes will always push it close to 1.0.

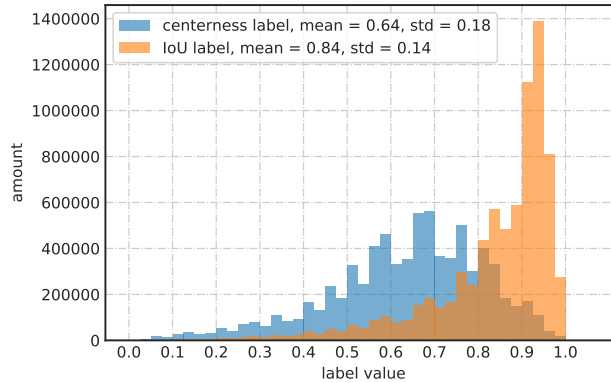

Figure 12: Label distributions over all positive training samples on COCO, based on pretrained GFL detector (ResNet-50 backbone).

## F More Examples of Distributed Bounding Boxes

We demonstrate more examples with General distributed bounding boxes predicted by GFL (ResNet-50 backbone). As demonstrated in Fig. 13, we show several cases with boundary ambiguities: does the slim and almost invisible backpack strap belong to the box of the bag (left top)? does the partially occluded umbrella handle belong to the entire umbrella (left middle)? In these cases, our models even produce more reasonable coordinates of bounding boxes than the ground-truth ones. In Fig. 14, more examples with clear boundaries and sharp General distributions are shown, where GFL is very confident to generate accurate bounding boxes, e.g., the bottom parts of the orange and the skiing woman.

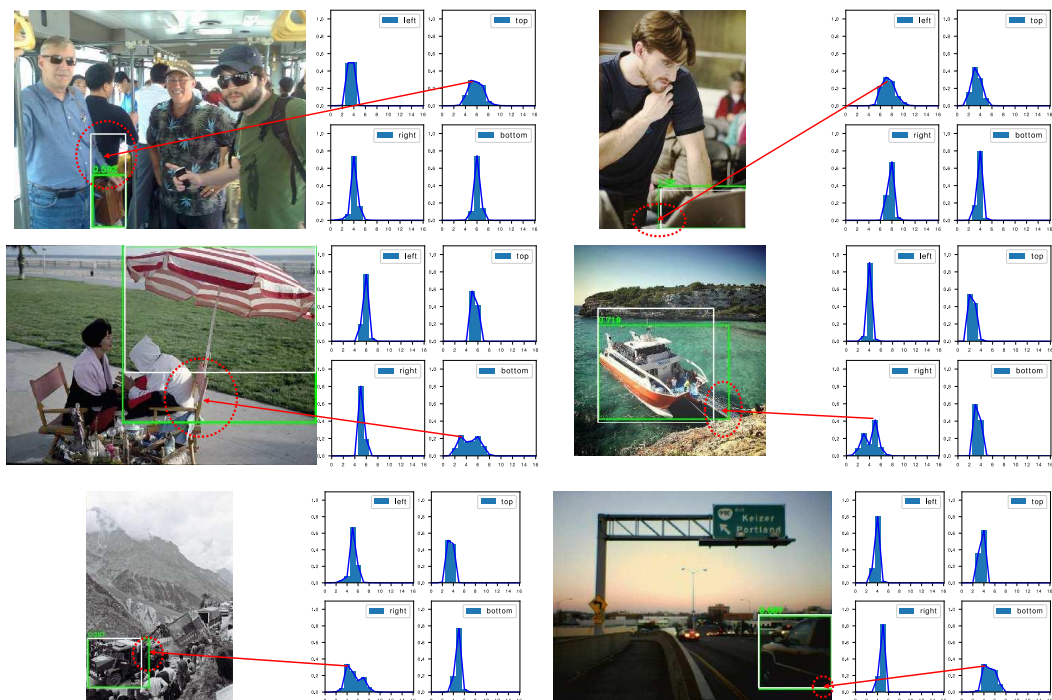

Figure 13: Examples with huge boundary ambiguities and uncertainties, where the learned General distributions tend to be flattened. In some cases, we even observe a distribution with two peaks. Interestingly, they do correspond to two different most likely boundaries in the image, e.g., the boundaries of the umbrella whether its heavily occluded handle is considered. Predictions are marked **green** in images, whilst ground-truth boxes are white.

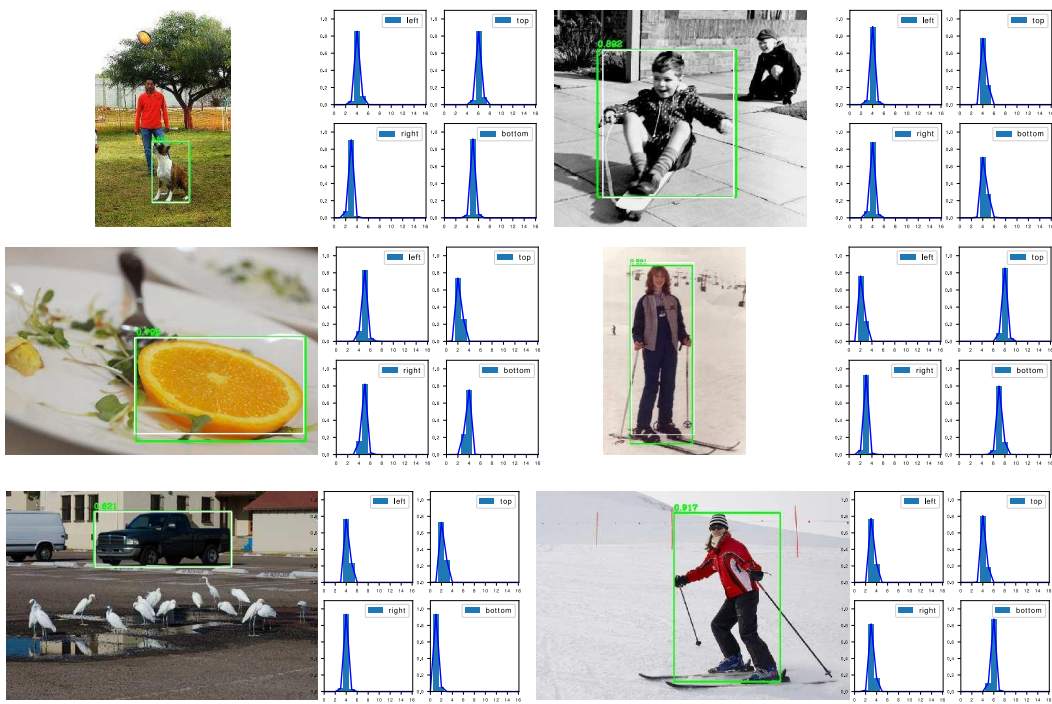

Figure 14: Examples with extremely clear boundaries. The learned General distributions are relatively sharp whilst producing very accurate box estimations. Predictions are marked **green** in images, whilst ground-truth boxes are white.
